# Supplementary material for: A high-throughput microfluidic diploid yeast long-term culturing (DYLC) chip capable of bud reorientation and concerted daughter dissection for replicative lifespan determination
Source: PubMed Central journal article supplement (PMC8973578; doi:10.1186/s12951-022-01379-9), 2022-03-31
Supplement: 12951_2022_1379_MOESM1_ESM.pdf [file 12951_2022_1379_MOESM1_ESM.pdf]

**A high-throughput microfluidic diploid yeast long-term culturing (DYLC) chip capable of bud reorientation and concerted daughter dissection for replicative lifespan determination**

Yingying Wang<sup>‡a</sup>, Zhen Zhu<sup>‡\*a</sup>, Ke Liu<sup>a</sup>, Qin Xiao<sup>a</sup>, Yangye Geng<sup>a</sup>, Feng Xu<sup>a</sup>, Shuiping Ouyang<sup>b</sup>, Ke Zheng<sup>b</sup>, Yimin Fan<sup>b</sup>, Nan Jin<sup>c</sup>, Xiangwei Zhao<sup>d</sup>, Mario A. Marchisio<sup>e</sup>, Dejing Pan<sup>f</sup>, and Qing-an Huang<sup>a</sup>

<sup>a</sup> Southeast University, Key Laboratory of MEMS of Ministry of Education, Sipailou 2, Nanjing 210096, China

<sup>b</sup> Nanjing Forestry University, College of Chemical Engineering, Longpan Road 159, Nanjing 210037, China

<sup>c</sup> Southeast University, ZhongDa Hospital, Dingjiaqiao 87, Nanjing 210009, China

<sup>d</sup> Southeast University, State Key Laboratory of Bioelectronics, Sipailou 2, Nanjing 210096, China

<sup>e</sup> Tianjin University, School of Pharmaceutical Science and Technology, Weijin Road 92, Tianjin 300072, China

<sup>f</sup> Soochow University, Cambridge-Suda Genomic Resource Center and Jiangsu Key Laboratory of Neuropsychiatric Diseases Research,, Ren-ai Road 199, Suzhou 215213, China

<sup>‡</sup> Equal contribution

\* To whom correspondence may be addressed. Email: [zhuzhen@seu.edu.cn](mailto:zhuzhen@seu.edu.cn)

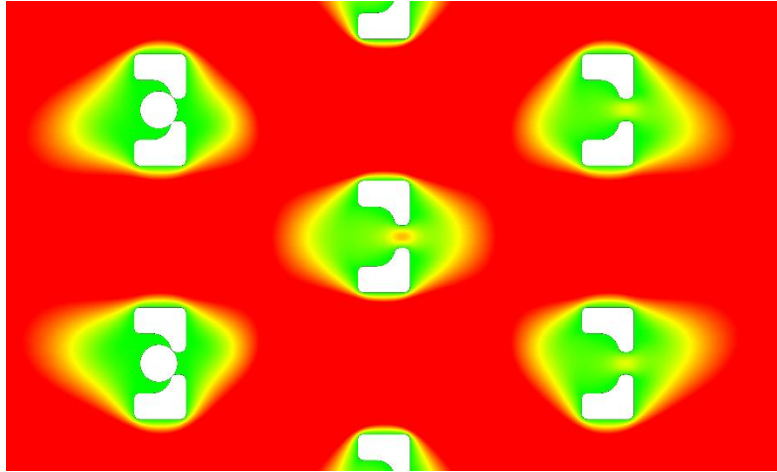

**Supplementary Video S1** Video of CFD simulation showing the dynamic process of cell trapping in the array. Cells in suspension bypass the occupied traps and are captured in empty traps downstream.

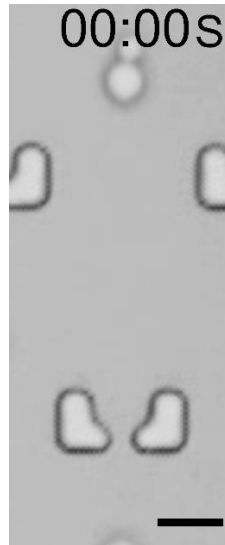

**Supplementary Video S2** A budded yeast cell was rotating when flowing towards an empty trap, and then immobilized at the trap. Afterwards, cells coming upstream were bypassing the occupied trap. In order to record the cell movement, the flow rate was slowed down to 0.5  $\mu\text{L}/\text{min}$ . Scale bar is 10  $\mu\text{m}$ .

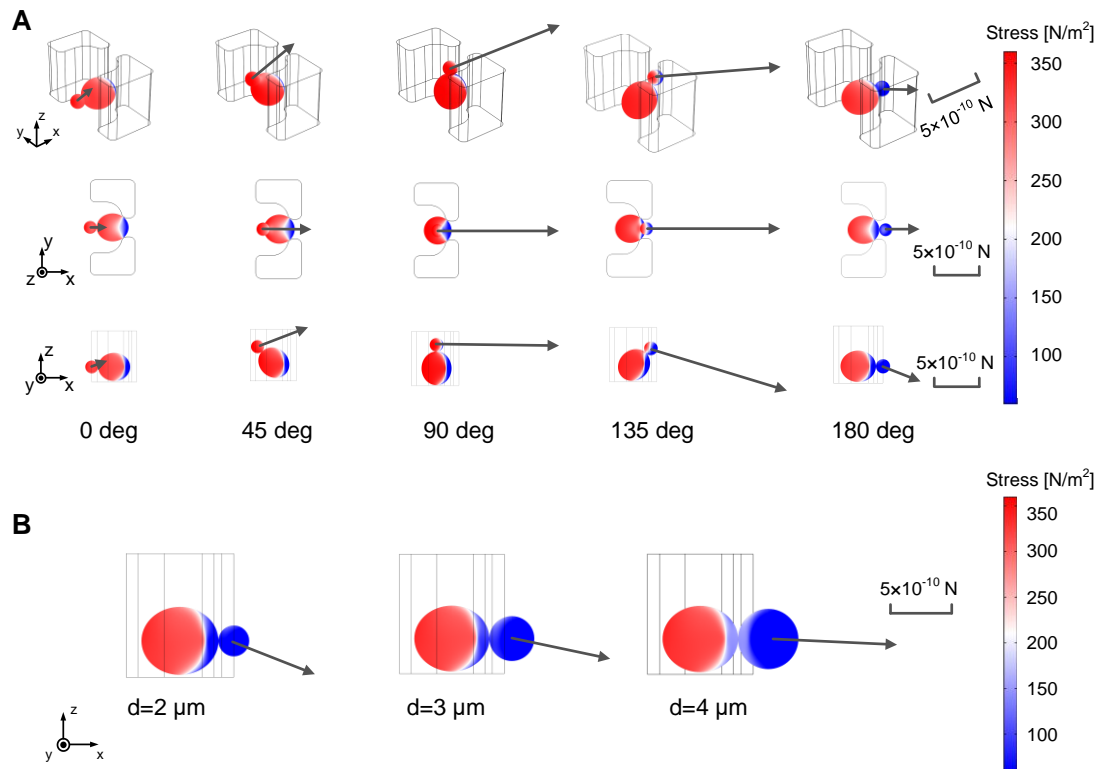

**Supplementary Figure S1** CFD simulation of hydrodynamic forces exerted on an immobilized budding yeast cell. (A) Hydrodynamic forces on the bud quantified by arrow length during hydrodynamic rotation of budding yeast from upstream to downstream in a 45-degree interval on the xz plane. (B) Hydrodynamic forces on a growing bud (diameter: 2  $\mu\text{m}$ , 3  $\mu\text{m}$  and 4  $\mu\text{m}$ ) towards the downstream to evaluate the cell retention and daughter detachment in the orifice.

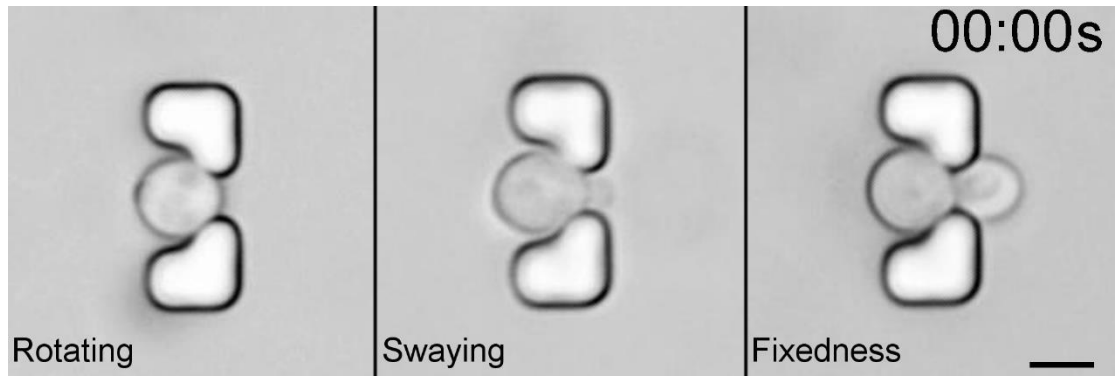

**Supplementary Video S3** Bud rotating, swaying and fixedness of immobilized budding yeast cells with their buds at different sizes. Scale bar is 5  $\mu\text{m}$ .

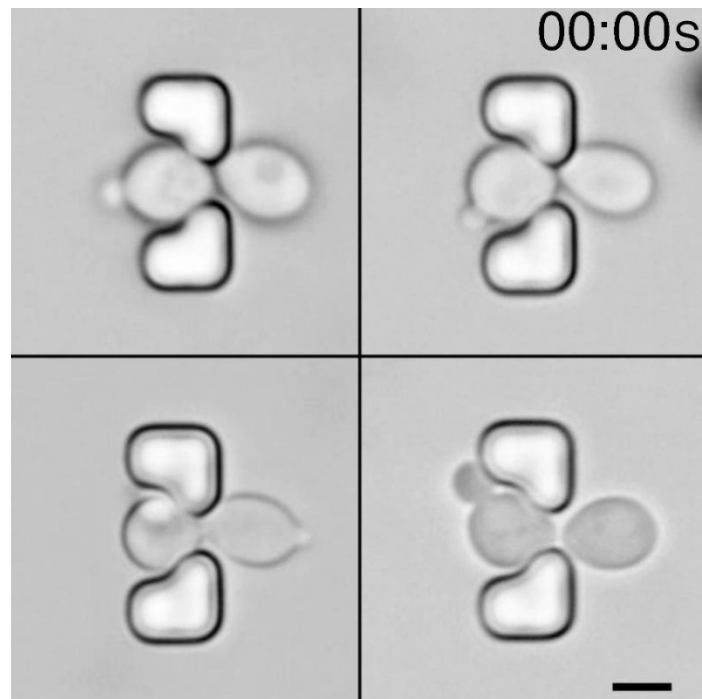

**Supplementary Video S4** Momentary daughter dissection and immediate bud reorientation towards downstream. Scale bar is 5  $\mu\text{m}$ .

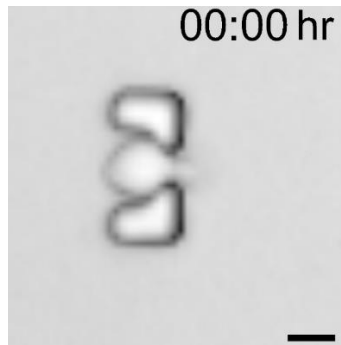

**Supplementary Video S5** Time-lapse images of the whole lifespan of an immobilized budding yeast cell from newborn to death (RLS: 25 generations). Scale bar is 5  $\mu\text{m}$ .

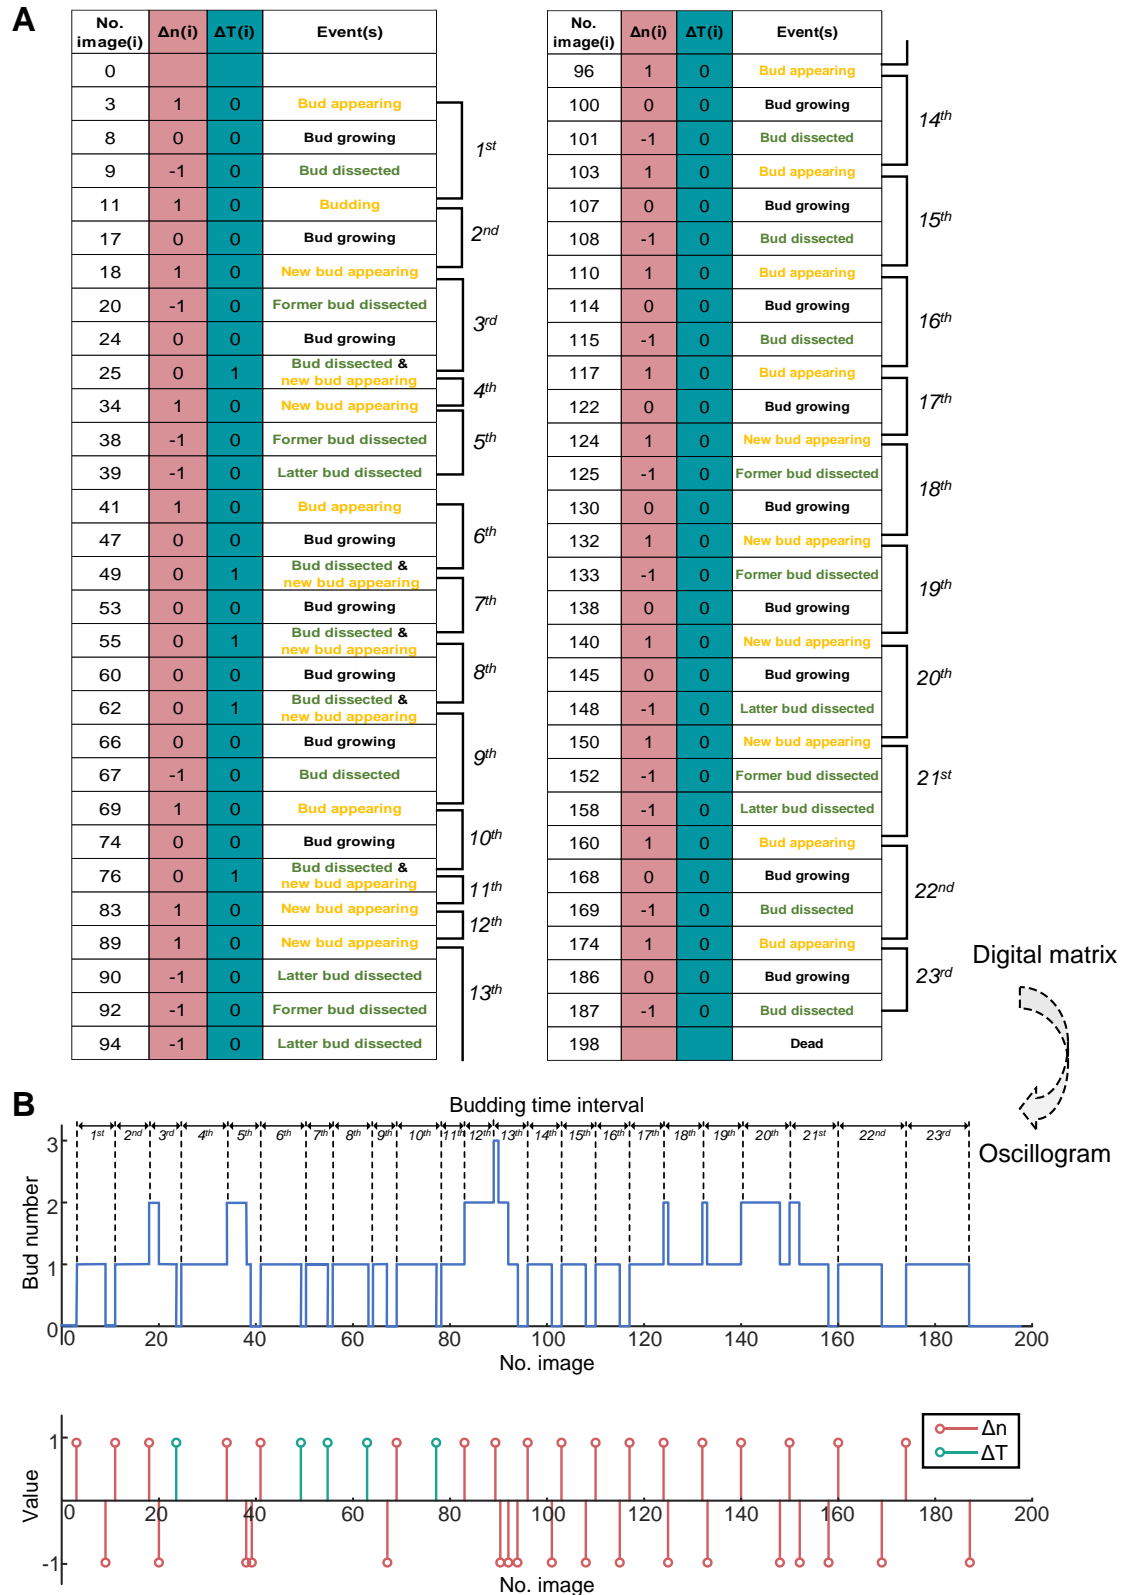

**Supplementary Figure S2** Calculation of RLS and BTI by using the digital matrix and oscillogram recorded from the representative cell in Figure 5(A).

**Supplementary Table S1.** A comparison of reported RLS data of budding yeast using conventional and microfluidic methods.

| Reference                                         | Strain                   | RLS        | Methods for daughter cell removal | No. samples |
|---------------------------------------------------|--------------------------|------------|-----------------------------------|-------------|
| This paper <sup>a</sup>                           | diploid BY4743           | 24.29±3.65 | Microfluidic                      | 786         |
| [1] Sarnoski, <i>iScience</i> , 2018 <sup>b</sup> | diploid BY4743           | 29±0.7     | Microfluidic                      | 50          |
| [2] Yang, <i>Cell Cycle</i> , 2011                | diploid BY4743           | 26.5       | Manual                            | 30-50       |
| [3] Lee, <i>PNAS</i> , 2019                       | diploid AH2601<br>AH2801 | 24         | Manual                            | 161         |
| [4] Kaerberlein, <i>Ageing Dev.</i> , 2005        | diploid BY4743           | 37.5       | Manual                            | 110         |
| [5] Qin, <i>Exp. Gerontol.</i> , 2006             | diploid BY4743           | 33.2±0.9   | Manual                            | 90          |
| [6] Delaney, <i>FEMS Yeast Res.</i> , 2013        | diploid BY4743           | 33.7       | Manual                            | 529         |
| [7] Jo, <i>PNAS</i> , 2015 <sup>c</sup>           | haploid<br>BY4741        | 25.76      | Microfluidic                      | 458         |
| [8] Crane, <i>PLOS ONE</i> , 2014 <sup>d</sup>    | haploid S288C            | 22.4       | Microfluidic                      | 422         |
| [9] Lee, <i>PNAS</i> , 2012 <sup>e</sup>          | haploid S288C            | 21         | Microfluidic                      | 76          |
| [10] Liu, <i>Cell Rep.</i> , 2015 <sup>f</sup>    | haploid BY<br>background | 29.3       | Microfluidic                      | 100         |
| [11] Minois, <i>PNAS</i> , 2015                   | haploid S288C            | 29.96±1.72 | Manual                            | 46          |
| [12] Defossez, <i>Mol. Cell</i> , 1999            | haploid K2307            | 23.7       | Manual                            | 50          |
|                                                   | haploid W303             | 21.6       |                                   | 37          |
| [13] Kang, <i>Mol. Biol. Cell</i> , 2022          | haploid<br>BY4741        | 29         | Manual                            | 28          |
| [14] Smith, <i>Genome Res.</i> , 2008             | haploid<br>BY4742        | 24.4       | Manual                            | 20          |

Separately, the microstructures designed for accommodating budding yeast cells in the microfluidic methods were <sup>a</sup> “leaky bowl”-shaped traps, <sup>b</sup> “[ ]”-shaped cages, <sup>c</sup> “U”-shaped traps, <sup>d</sup> “/\”-shape traps, <sup>e</sup> “pensile pads”, <sup>f</sup> “U”-shaped traps.



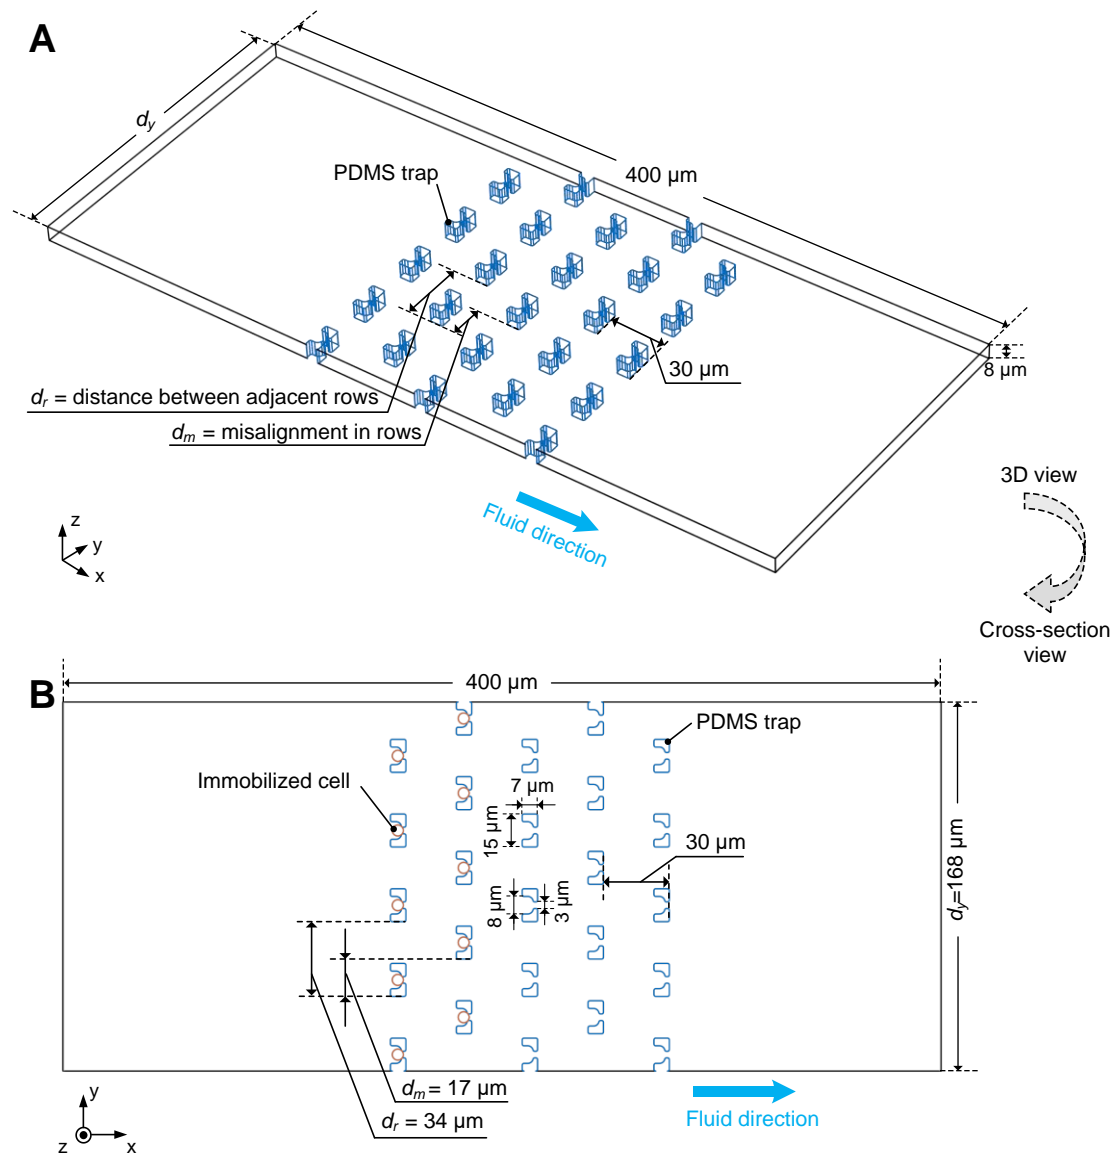

**Supplementary Figure S3** Wireframes of the model geometry containing channel walls (black), a  $5 \times 5$  array of cell traps (blue) and immobilized yeast cells (brown) and culturing medium filled in the residual space of the model. (A) 3D view of the simplified geometric model established as follows: A  $5 \times 5$  cell-trap array with different settings of geometric features ( $d_r$  and  $d_m$ ) was placed in the middle of a microchannel, which featured  $400 \mu\text{m} \times 8 \mu\text{m}$  outer profile in  $xz$ -dimension and variable length  $d_y$  in  $y$ -axis for fitting 5 columns of traps. The distance between adjacent columns was set to  $30 \mu\text{m}$ . (B) 2D cross-section view of the array for particle trajectory tracing.  $d_r$ ,  $d_m$  and  $d_y$  in modeling were set to  $34 \mu\text{m}$ ,  $17 \mu\text{m}$  and  $158 \mu\text{m}$ , respectively.

**Supplementary Table S2.** Geometric settings of the cell-trap array in CFD simulation

| Setting | Distance between adjacent rows ( $d_r$ ) [ $\mu\text{m}$ ] | Misalignment in rows ( $d_m$ ) [ $\mu\text{m}$ ] | Outer profile in y-dimension ( $d_y$ ) [ $\mu\text{m}$ ] |
|---------|------------------------------------------------------------|--------------------------------------------------|----------------------------------------------------------|
| 1       | 30                                                         | $10 (\frac{1}{3}d_r)$                            | 155                                                      |
| 2       | 30                                                         | $15 (\frac{1}{2}d_r)$                            | 150                                                      |
| 3       | 34                                                         | $17 (\frac{1}{2}d_r)$                            | 168                                                      |

**Supplementary Table S3.** General settings and parameters in CFD simulation

| Parameter                   | Setting/Value          |
|-----------------------------|------------------------|
| Boundary condition at walls | No-slip condition      |
| Flow speed at inlet         | 5 m/s                  |
| Density of fluid subdomain  | 1000 kg/m <sup>3</sup> |
| Dynamic viscosity           | 0.001 Pa•s             |

**Supplementary Table S4.** Settings and parameters of particle trajectory tracing in cell-trapping simulation

| Parameter                                | Setting/Value             |                         |
|------------------------------------------|---------------------------|-------------------------|
| Flow speed at inlet                      | 0.004 m/s                 |                         |
| Boundary condition of particles at walls | Bounce                    |                         |
| Particle properties                      | Mass                      | $1 \times 10^{-12}$ kg  |
|                                          | Diameter                  | $1 \times 10^{-6}$ m    |
| Inlet boundary                           | Particle initial position | Uniform distribution    |
|                                          | Number of particles       | 200                     |
|                                          | Particle initial velocity | Equal to fluid velocity |
|                                          | Particle release time     | 0 s                     |

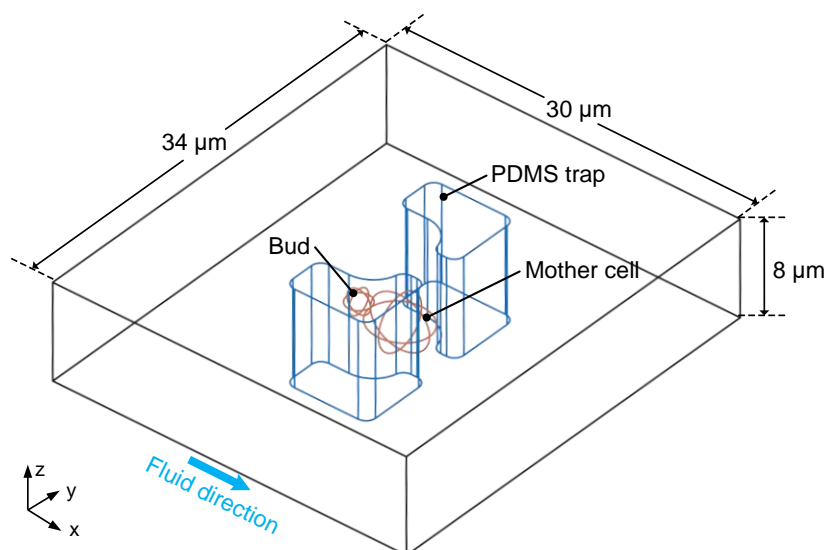

**Supplementary Figure S4** 3D wireframe of the model geometry in simulation of bud rotation in a single trap, containing channel walls (black), a trap (blue) and a budding yeast cell (brown) and culturing medium filled in the residual space of the model. Geometric conditions were set as follows: The trap was placed in the center with  $30\ \mu\text{m} \times 34\ \mu\text{m} \times 8\ \mu\text{m}$  outer profile in xyz-dimension; the budding yeast cell was set as a conjugation of an ellipsoid ( $5\ \mu\text{m} \times 4.4\ \mu\text{m}$ ) and a sphere ( $2\ \mu\text{m}$  in diameter), contacting with each other at the upstream end of the major axis of the ellipsoid initially. To imitate the bud rotation in the trap, the mother cell together with its bud, were set to rotate from -x to +x direction along the xz-plane with a 45-degree interval, meanwhile the mother was kept contacting with the “bowl” bottom; to imitate bud growth after the bud was relocated in the narrow orifice, the diameter of the sphere was set  $2\ \mu\text{m}$ ,  $3\ \mu\text{m}$  and  $4\ \mu\text{m}$ , respectively.

## Reference

- [1] Sarnoski EA, Song R, Ertekin E, Koonce N, Acar M (2018) Fundamental Characteristics of Single-Cell Aging in Diploid Yeast. *iScience* 7, 96-109. 10.1016/j.isci.2018.08.011.
- [2] Yang J, Dungrawala H, Hua H, Manukyan A, Abraham L, Lane W, Mead H, Wright J, Schneider BL (2011). Cell size and growth rate are major determinants of replicative lifespan. *Cell cycle* 10(1): 144-155. org/10.4161/cc.10.1.14455
- [3] Lee MB, Dowsett IT, Carr DT, Wasko BM, Stanton SG, Chung MS, Ghodsian N, Bode A, Kiflezghi MG, Uppal PA, Grayden KA, Elala YC, Tang TT, Tran NHB, Tran THB, Diep AB, Hope M, Promislow DEL, Kennedy SR, Kaeberlein M, Herr AJ (2019) Defining the impact of mutation accumulation on replicative lifespan in yeast using cancer-associated mutator phenotypes. *Proc Natl Acad Sci U S A.*, 116(8): 3062-3071.
- [4] Kaeberlein M, Kirkland KT, Fields S, et al (2015) Genes determining yeast replicative life span in a long-lived genetic background. *Mech. Ageing Dev.* 126(4):491-504.
- [5] Qin H, Lu M (2006) Natural variation in replicative and chronological life spans of *Saccharomyces cerevisiae*. *Exp. Gerontol.* 41(4), 448-456. 10.1016/j.exger.2006.01.007.
- [6] Delaney J R, Chou A, Olsen B, et al (2013) End-of-life cell cycle arrest contributes to stochasticity of yeast replicative aging. *FEMS Yeast Res.* 13(3): 267-276.
- [7] Jo MC, Liu W, Gu L, Dang W, Qin L (2015) High-throughput analysis of yeast replicative aging using a microfluidic system. *Proc Natl Acad Sci U S A.* 112, 9364-9369. 10.1073/pnas.1510328112.
- [8] Crane MM, Clark IB, Bakker E, Smith S, Swain PS (2014) A Microfluidic System for Studying Ageing and Dynamic Single-Cell Responses in Budding Yeast. *PLoS One* 9, e100042. 10.1371/journal.pone.0100042.
- [9] Lee SS, Avalos Vizcarra I, Huberts DH, Lee LP, Heinemann M (2012) Whole lifespan microscopic observation of budding yeast aging through a microfluidic dissection platform. *Proc Natl Acad Sci U S A* 109, 4916-4920.
- [10] Liu P, Young TZ, Acar M (2015) Yeast Replicator: A High-Throughput Multiplexed Microfluidics Platform for Automated Measurements of Single-Cell Aging. *Cell Rep.* 13, 634-644. 10.1016/j.celrep.2015.09.012.
- [11] Minois N, Frajnt M, Wilson C, Vaupel JW (2005) Advances in measuring lifespan in the yeast *Saccharomyces cerevisiae*. *Proc Natl Acad Sci U S A.* 102(2), 402-406.
- [12] Defossez PA, Prusty R, Kaeberlein M, et al (1999) Elimination of replication

block protein Fob1 extends the life span of yeast mother cells. *Mol. cell*, 3(4): 447-455.

[13] Kang P J, Mullner R, Li H, et al (2022) Upregulation of the Cdc42 GTPase limits the replicative lifespan of budding yeast. *Mol. Biol. Cell* E20-01-0087.

[14] Smith ED, Tsuchiya M, Fox LA, et al (2018) Quantitative evidence for conserved longevity pathways between divergent eukaryotic species. *Genome Res.* 18(4): 564-570.
